# Supplementary material
Source: HighWire-hosted journal article supplement (https://www.cmajopen.ca/highwire/filestream/85471/field_highwire_adjunct_files/2/2020-0116-original-submission.pdf)
Supplement: 2020-0116-original-submission.pdf [file 2020-0116-original-submission.pdf]

1  
2  
3  
4  
5  
6  
7  
8  
9  
10  
11  
12  
13  
14  
15  
16  
17  
18  
19  
20  
21  
22  
23  
24  
25  
26  
27  
28  
29  
30  
31  
32  
33  
34  
35  
36  
37  
38  
39  
40  
41  
42  
43  
44  
45  
46  
47  
48  
49  
50  
51  
52  
53  
54  
55  
56  
57  
58  
59  
60

Are we choosing wisely for children's distal radius fracture treatment? A population-based study using administrative data.

**Authors:**

Tara Baxter, MD, MSc  
Teresa To, PhD  
Maria Chiu, PhD  
Mark Camp, MD, FRCSC  
Andrew Howard, MD, FRCSC, MSc

**Corresponding Author:**

Tara Baxter: tara.baxter@medportal.ca

**Funding statement:**

No funding to declare

**Declaration of competing interest:**

No authors have any declarations to make

**Notes:**

Full methodology and ICES coding available on request

## Abstract

### Background:

Low risk distal radius fractures are the most common paediatric fracture. Ten RCTs over the last two decades support treating many of these fractures with removable immobilization and without physician follow-up. We conducted a retrospective population-based cohort study using administrative data to determine the proportion of these fractures being treated according to best-evidence. We also determined whether different hospital and physician types make different choices regarding care.

### Methods:

We included children aged 2-14 with distal radius fractures having had no reduction or operation within a six week period, and who were treated in Ontario emergency departments from 2003-2015. Proportions of patients receiving best-evidence care were determined. Multivariable log binomial regression was used to quantify associations between hospital and physician type and best-evidence treatment.

### Results:

70,801 fractures were analyzed. Only 21% were treated according to best-evidence, and consistent across all years of the study. Treatment in a small hospital emergency department (RR 1.86, 95%CI 1.72-2.01), treatment by a paediatrician (RR 1.22, 95%CI 1.11-1.34) or subspecialty paediatric emergency medicine trained physician (RR 1.73, 95%CI 1.56-1.92) was most likely to result in best-evidence treatment.

### Interpretation:

Significant over-utilization of physician resources for low-risk distal radius fractures continues long after the first randomized trials showed it to be unnecessary. Academic and paediatric physician types that are involved in generating, presenting, and publishing best-evidence for this fracture type are most successfully implementing it.

## Introduction

Distal radius fractures are the most common paediatric orthopaedic injury, with an estimated 10,000 fractures yearly in Ontario<sup>1</sup>. The majority of these fractures are minimally displaced (initial angulation <15 degrees in the sagittal plane and <5mm translation on the frontal plane), low-risk and amenable to treatment with a removable splint, yielding excellent clinical results. The largest numbers of such fractures are stable injuries (called either buckle or torus fractures) in which paediatric bone deforms without completely breaking.

Historically these fractures have been seen for follow-up in hospital fracture clinics by orthopaedic surgeons. However, a large body of evidence accumulated over the last two decades has demonstrated that this is unnecessary and results in over treatment, increased costs and more complications<sup>2-7</sup>. Rather, these fractures can be treated using a simplified algorithm which consists of a single x-ray for diagnosis, removable immobilization that is taken off at home, and without physician follow-up, with equivalent outcomes<sup>8-37</sup>. Choosing Wisely UK has even included plaster casting and scheduled follow-up for distal radius buckle fractures in its list of treatments and procedures that are of little or no benefit to patients<sup>38</sup>. Similar widespread guidelines have yet to be published in North America.

Despite the evidence, large numbers of referrals to Canadian orthopaedic surgeons have persisted for this fracture type<sup>39-40, 44</sup>. Why is Canada not choosing wisely, we ask? Application of best-evidence is linked to hospital infrastructure and resources, physician education and training, and research affiliation, but these relationships have not been well studied for low-risk paediatric distal radius fractures (LRPDRF)<sup>28, 39-53</sup>. We conducted a retrospective population based cohort study to determine the proportion of LRPDRF being treated according to best-evidence and to determine whether different hospital and physician types make different choices regarding care.

## Methods

### Design and participants

The design is a retrospective population-based cohort study of children with LRPDRF, using administrative data.

The population studied is all children aged 2-12 years for girls, and 2-14 years for boys with a diagnosis of LRPDRF in an Ontario ED between October 1st, 2003 and February 17, 2015, and living in Ontario at the time of diagnosis and follow-up. Patients were excluded if they were admitted to hospital, the fracture was manipulated or operated on, there were other concomitant fractures, or had comorbidities that would necessitate increased fracture surveillance.

### Data sources

Data were obtained by linking multiple administrative databases housed at ICES (formerly the Institute for Clinical Evaluative Sciences) in Toronto, Ontario.

### Exposure

The primary exposure of interest was hospital type, having 4 categories:

- Paediatric hospital
- Academic hospital (non-paediatric CAHO members)
- Community hospital (other hospitals)
- Small hospital (single community provider, annual weighted case load <2700<sup>54</sup>)

The secondary exposure of interest was physician type providing treatment in the ED, having 6 categories:

- Emergency medicine (ER)
- General or family practitioner with emergency medicine certification (FP/ER)
- Family or general practitioner (FP/GP)
- Paediatrician
- Subspecialty paediatric emergency medicine (PEM)
- Orthopaedic surgery

## Covariates

Other covariates collected were year of service, age, gender, rural location of residence, deprivation quintile, year of MD graduation, and hospital rurality.

## Primary Outcome

The primary outcome of interest was whether best-evidence treatment occurred, operationalized as a binary, yes/no, variable. Best-evidence treatment was defined as having no follow-up visit with a clinician for the LRPDRF coded in the administrative data for a period of 6 weeks following the initial visit to the ED.

## Statistical analysis

Statistical analysis was conducted using SAS v9.4.

Baseline descriptive characteristics were calculated and reported for all variables of interest. The total proportion of children receiving best evidence care was calculated for each year of the study.

A multivariable log binomial regression model was used to assess the association between hospital and physician type and best-evidence treatment. The multivariable model was chosen *a priori* based on physician judgment of the potential clinical relevance of available covariates and consisted of the outcome variable, best-evidence treatment, variables of interest hospital and physician type, and covariates age, sex, deprivation quintile, rural residence, and fiscal year.

## Ethics Approval

This study was approved by the Research Ethics Board at the Hospital for Sick Children and the University of Toronto.

## Results

After applying exclusion criteria, 70,801 LRPDRF were identified for analysis.

### Objective 1: Proportion receiving best-evidence care

Table 1 shows the results of the descriptive analysis. Overall, twenty-one percent of patients with LRPDRF received no follow-up after their initial ED visit (ie.: best-evidence care). The remaining 79% received follow-up with either an orthopaedic surgeon (69%) or a primary care practitioner (10%). This trend was consistent throughout all individual years of the study (Figure 1).

### Objective 2: Multivariable log binomial regression

Results of the multivariable analysis are shown in Table 2 and Figure 2.

#### Hospital Type

Small hospital type had the largest positive association with best-evidence care (RR 1.86, 95% CI 1.72-2.01,  $p < 0.0001$ ) when compared with teaching hospitals as a reference category. Paediatric hospital (RR 1.16, 95% CI 1.07-1.26,  $p = .0002$ ) and community hospital (RR 1.13, 95% CI 1.06-1.20,  $p < .0001$ ) types were also statistically significant predictors of receiving best-evidence care in the ED.

#### Physician Type

The risk ratios for PEM training (RR 1.73, 95% CI 1.56-1.92,  $p < .0001$ ), paediatricians (RR 1.22, 95% CI 1.11-1.34,  $p < .0001$ ), FP/GP (RR 1.09, 95% CI 1.02-1.16,  $p = .0077$ ), and orthopaedic surgeons (RR 0.77, 95% CI 0.64-0.92,  $p = .0027$ ) were statistically significant when compared with ER as a reference category. FP/ER training was not a statistically significant predictor (RR 1.00, 95% CI 0.94-1.06,  $p = .9474$ ).

#### Other Covariates

Rural patient residence showed a large statistically significant association with best-evidence

1  
2  
3 treatment after adjustment (RR 1.44 95% CI 1.38-1.50,  $p < .0001$ ). Female sex had a small but  
4 statistically significant association (RR 1.08, 95% CI 1.05-1.11,  $p < .0001$ ). One patient  
5 deprivation quintile reached statistical significance (fourth quintile, RR 1.06, 95% CI 1.01-1.10,  
6  $p .0171$ ), with no trend demonstrated amongst the quintiles. Age was not a significant predictor  
7 (RR 1.00, 95% CI 0.99-1.01,  $p .1572$ ).  
8  
9  
10  
11  
12  
13  
14  
15  
16

## 17 Interpretation

18  
19 A substantial body of evidence exists to support simplified treatment for LRPDRF, with most of  
20 the literature having been published since 2002. Until now, little was known about the  
21 application of this evidence and the factors that contribute to it. Our results indicate a large gap  
22 between what best-evidence recommends, and what is practically done in LRPDRF care. Most  
23 surprising is the finding that evidence application has not improved over time. With only 21% of  
24 patients receiving care in line with best-evidence recommendations, we are left to wonder where  
25 the disconnect exists between evidence generation and application for this injury.  
26  
27  
28  
29  
30  
31  
32

33 Hospital and physician type emerged as important determinants of treatment received; paediatric  
34 and small hospitals and PEM trained physicians were most likely to provide best-evidence care.  
35  
36  
37

38 Limited resources in the small hospital or rural settings may be an asset in the provision of best-  
39 evidence treatment for LRPDRF. ED physicians in these settings have likely developed  
40 excellent resource stewardship skills out of necessity. Furthermore, fracture clinics and  
41 orthopaedic surgeons may not be as readily available as they are in large or urban centers, or may  
42 be located far from the patient's residence.  
43  
44  
45  
46  
47  
48

49 The finding that paediatric hospital type and PEM specialists are associated with application of  
50 best-evidence care is not surprising; Canadian research on best practices for LRPDRF was  
51 largely conducted in paediatric hospitals through collaboration with PEM specialists and  
52 research groups. Standardized treatment protocols may also exist in these EDs, with their rollout  
53 championed by PEM specialists and other research group affiliates.  
54  
55  
56  
57  
58  
59  
60

1  
2  
3  
4  
5 To our knowledge, this study presents the first population-based investigation of factors affecting  
6 the application of best-evidence in LRPDRF care. Strengths of this study are the use of  
7 prospectively collected administrative data, large sample size, and robust sensitivity analyses.  
8  
9 Furthermore, our results may be generalizable to other Canadian provinces and territories, whose  
10 health care systems are similarly structured and experience similar constraints. Limitations of  
11 this study include the use of data that was not intended for health research, limitations with data  
12 linkage and availability, and the use of a non-validated algorithm to isolate our cohort of interest.  
13  
14  
15  
16  
17  
18  
19

## 20 21 **Conclusion**

22  
23 While no follow-up for LRPDRF is ideal, some patients may need reassurance while the fracture  
24 is healing and thus may require a follow-up appointment. A visit with a primary care  
25 practitioner is appropriate in this setting. Patients can be referred to an orthopaedic surgeon if  
26 concerns arise that cannot be addressed in primary care. An orthopaedic follow-up visit for  
27 distal radius fracture care can be billed to OHIP for up to 151\$, while a follow-up with a family  
28 doctor costs 20-33\$<sup>55</sup>, therefore the potential social and economic impact of this unnecessary  
29 care is large<sup>10, 13-14, 22, 56-58</sup>.  
30  
31  
32  
33  
34  
35  
36  
37

38 How can we best encourage adoption of best-evidence practices for LRPDRF? We recommend  
39 a multimodal approach with a focus on known barriers<sup>39-41</sup>:  
40  
41

42 At the hospital level, EDs should have access and funding for materials to provide removable  
43 forms of immobilization. The widespread implementation of clinical care guidelines, with  
44 enthusiastic support from champions of evidence based care, could help guide decision making  
45 in EDs. Fostering a cooperative atmosphere between specialties is imperative for timely and  
46 accurate diagnosis and to support ED physicians to confidently apply guidelines.  
47  
48  
49  
50

51  
52 For physicians, availability of information in interdisciplinary journals and conferences would  
53 yield a larger audience. Interactive CME modules covering musculoskeletal topics are currently  
54  
55  
56  
57  
58  
59  
60



1  
2  
3 being explored as an innovative option at our institution. A “virtual fracture clinic” is an  
4 approach used in the UK; fracture diagnosis is confirmed virtually by an orthopaedic surgeon,  
5 thereby providing decision support for ED physicians and alleviating medicolegal concerns. The  
6 development of national guidelines by influential groups like the American Academy of  
7 Orthopaedic Surgeons, or Choosing Wisely Canada may be of most benefit. Physician concerns  
8 regarding lost income resulting from eliminating follow-up or added workload from additional  
9 radiograph interpretations could be addressed with the institution of bundled fees and/or salaried  
10 work.  
11  
12  
13  
14  
15  
16  
17

18 For patients, additional information and support may be beneficial in the form of pamphlets,  
19 printed instructions, and phone applications offering specific fracture care information and  
20 virtual follow-up.  
21  
22  
23  
24

25 Future directions include a multicenter prospective cohort study which would increase diagnostic  
26 accuracy, allow discrimination between subtypes of LRPDRF, and include more detailed  
27 hospital, physician, and patient factors than were available through ICES. Further research on  
28 physician behaviour could help identify specific areas of disconnect between best-evidence and  
29 practice. Finally, costing analyses could quantify potential cost savings and inform a revision of  
30 funding models and/or fee schedules to better reflect and support the provision of best-evidence  
31 care.  
32  
33  
34  
35  
36  
37  
38  
39  
40  
41  
42  
43  
44  
45  
46  
47  
48  
49  
50  
51  
52  
53  
54  
55  
56  
57  
58  
59  
60

## References

1. Escott B. Childhood Fracture Begets Childhood Fracture: A Population-based Study of Longitudinal Fracture Patterns in Ontario Children [master's thesis]. [Toronto(ON)]: University of Toronto; 2012. 71p.
2. Monroe KC, Sund SA, Nemeth BA, Noonan KJ, Halanski MA. Cast-saw injuries: assessing blade-to-skin contact during cast removal. Does experience or education matter? *Phys Sportsmed*. 2014 Feb;42(1):36-44.
3. Ansari MZ, Swarup S, Ghani R, Tovey P. Oscillating saw injuries during removal of plaster. *Eur J Emerg Med*. 1998 Mar;5(1):37-9
4. Katz K, Fogelman R, Attias J, Baron E, Soudry M. Anxiety reaction in children during removal of their plaster cast with a saw. *J Bone Joint Surg Br*. 2001 Apr;83(3):388-90.
5. Shore BJ, Hutchinson S, Harris M, Bae DS, Kalish LA, Maxwell W 3rd, Waters P. Epidemiology and prevention of cast saw injuries: results of a quality improvement program at a single institution. *J Bone Joint Surg Am*. 2014 Feb 19;96(4):e31.
6. Halanski M, Noonan KJ. Cast and splint immobilization: complications. *J Am Acad Orthop Surg*. 2008 Jan;16(1):30-40. Review.
7. Bridges, A. (2017, July 19) 'Inadequate and insulting': Sask. family unhappy doctor not disciplined after boy burned during cast removal. *CBC News*. Retrieved from <http://www.cbc.ca/news/canada/saskatoon/burns-cast-removal-saskatoon-saw-1.4211672>
8. Bae DS, Howard AW. Distal radius fractures: what is the evidence? *J Pediatr Orthop*. 2012 Sep;32 Suppl 2:S128-30.
9. Bennett DL, Mencio GA, Hernanz-Schulman M, Nealy BJ, Damon B, Kan JH. Buckle fractures in children: Is urgent treatment necessary? *J Fam Pract*. 2009 Oct;58(10):E1-6. Erratum in: *J Fam Pract*. 2010 Jan;59(1):13.
10. Farbman KS, Vinci RJ, Cranley WR, Creevy WR, Bauchner H. The role of serial radiographs in the management of pediatric torus fractures. *Arch Pediatr Adolesc Med*. 1999 Sep;153(9):923-5.
11. van Bosse HJ, Patel RJ, Thacker M, Sala DA. Minimalistic approach to treating wrist torus fractures. *J Pediatr Orthop*. 2005 Jul-Aug;25(4):495-500.
12. Al-Ansari K, Howard A, Seeto B, Yoo S, Zaki S, Boutis K. Minimally angulated pediatric wrist fractures: is immobilization without manipulation enough? *CJEM*. 2007 Jan;9(1):9-15.

13. Davidson JS, Brown DJ, Barnes SN, Bruce CE. Simple treatment for torus fractures of the distal radius. *J Bone Joint Surg Br.* 2001 Nov;83(8):1173-5.
14. Do TT, Strub WM, Foad SL, Mehlman CT, Crawford AH. Reduction versus remodeling in pediatric distal forearm fractures: a preliminary cost analysis. *J Pediatr Orthop B.* 2003 Mar;12(2):109-15.
15. Ben-Yakov M, Boutis K. Buckle fractures of the distal radius in children. *CMAJ.* 2016 Apr 19;188(7):527.
16. Symons S, Rowsell M, Bhowal B, Dias JJ. Hospital versus home management of children with buckle fractures of the distal radius. A prospective, randomised trial. *J Bone Joint Surg Br.* 2001 May;83(4):556-60.
17. West S, Andrews J, Bebbington A, Ennis O, Alderman P. Buckle fractures of the distal radius are safely treated in a soft bandage: a randomized prospective trial of bandage versus plaster cast. *J Pediatr Orthop.* 2005 May-Jun;25(3):322-5.
18. Plint AC, Perry JJ, Correll R, Gaboury I, Lawton L. A randomized, controlled trial of removable splinting versus casting for wrist buckle fractures in children. *Pediatrics.* 2006 Mar;117(3):691-7.
19. Williams KG, Smith G, Luhmann SJ, Mao J, Gunn JD 3rd, Luhmann JD. A randomized controlled trial of cast versus splint for distal radial buckle fracture: an evaluation of satisfaction, convenience, and preference. *Pediatr Emerg Care.* 2013 May;29(5):555-9.
20. Kropman RH, Bemelman M, Segers MJ, Hammacher ER. Treatment of impacted greenstick forearm fractures in children using bandage or cast therapy: a prospective randomized trial. *J Trauma.* 2010 Feb;68(2):425-8.
21. Khan KS, Grufferty A, Gallagher O, Moore DP, Fogarty E, Dowling F. A randomized trial of 'soft cast' for distal radius buckle fractures in children. *Acta Orthop Belg.* 2007 Oct;73(5):594-7.
22. Witney-Lagen C, Smith C, Walsh G. Soft cast versus rigid cast for treatment of distal radius buckle fractures in children. *Injury.* 2013 Apr;44(4):508-13.
23. Vernooij CM, Vreeburg ME, Segers MJ, Hammacher ER. Treatment of torus fractures in the forearm in children using bandage therapy. *J Trauma Acute Care Surg.* 2012 Apr;72(4):1093-7.
24. Mbubaegbu CE, Munshi NI, Currie L. Audit of patient satisfaction with selfremovable soft cast for greenstick fractures of the distal radius. *J. Clin. Effect.* 1997 Mar; 2(1):14-15.
25. Solan MC, Rees R, Daly K. Current management of torus fractures of the distal radius. *Injury.* 2002 Jul;33(6):503-5.

- 1  
2  
3 26. Bochang C, Katz K, Weigl D, Jie Y, Zhigang W, Bar-On E. Are frequent radiographs  
4 necessary in the management of closed forearm fractures in children? *J Child Orthop*. 2008  
5 Jun;2(3):217-20. doi: 10.1007/s11832-008-0101-5. Epub 2008 Apr 26.  
6  
7  
8 27. Plint AC, Perry JJ, Tsang JL. Pediatric wrist buckle fractures. Should we just splint and go?  
9 *CJEM*. 2004 Nov;6(6):397-401.  
10  
11 28. Koelink E, Schuh S, Howard A, Stimec J, Barra L, Boutis K. Primary Care Physician  
12 Follow-up of Distal Radius Buckle Fractures. *Pediatrics*. 2016 Jan;137(1).  
13  
14 29. Boutis K, Willan A, Babyn P, Goeree R, Howard A. Cast versus splint in children with  
15 minimally angulated fractures of the distal radius: a randomized controlled trial. *CMAJ*. 2010  
16 Oct 5;182(14):1507-12.  
17  
18  
19 30. Noonan KJ, Price CT. Forearm and distal radius fractures in children. *J Am Acad Orth Surg*.  
20 1998 6:146-156  
21  
22 31. Abraham A, Handoll HH, Khan T. Interventions for treating wrist fractures in children.  
23 *Cochrane Database Syst Rev*. 2008 Apr 16;(2):CD004576.  
24  
25  
26 32. Jiang N, Cao ZH, Ma YF, Lin Z, Yu B. Management of Pediatric Forearm Torus Fractures:  
27 A Systematic Review and Meta-Analysis. *Pediatr Emerg Care*. 2016 Nov;32(11):773-778.  
28 Review.  
29  
30  
31 33. Hill CE, Masters JP, Perry DC. A systematic review of alternative splinting versus complete  
32 plaster casts for the management of childhood buckle fractures of the wrist. *J Pediatr Orthop B*.  
33 2016 Mar;25(2):183-90.  
34  
35 34. Firmin F, Crouch R. Splinting versus casting of "torus" fractures to the distal radius in the  
36 paediatric patient presenting at the emergency department (ED): a literature review. *Int Emerg*  
37 *Nurs*. 2009 Jul;17(3):173-8.  
38  
39  
40 35. Howes MC, Cutting P, Thomas M. Best Evidence Topic report. Bet2. Splinting of buckle  
41 fractures of the distal radius in children. *Emerg Med J*. 2008 Apr;25(4):222-3.  
42  
43 36. May G, Grayson A. Towards evidence based emergency medicine: best BETs from the  
44 Manchester Royal Infirmary. Bet 3: do buckle fractures of the paediatric wrist require follow up?  
45 *Emerg Med J*. 2009 Nov;26(11):819-22.  
46  
47  
48 37. Raymond T. Morrissy, Stuart L. Weinstein. (2006). Lovell and Winter's pediatric  
49 orthopaedics. Philadelphia :Lippincott Williams & Wilkins.  
50  
51  
52  
53  
54  
55  
56  
57  
58  
59  
60

- 1  
2  
3  
4  
5  
6  
7 38. Choosing Wisely UK. [2016]. Recommendations, Royal College of Emergency Medicine.  
8 Retrieved from [http://www.choosingwisely.co.uk/i-am-a-](http://www.choosingwisely.co.uk/i-am-a-clinician/recommendations/#1476654326462-140275b8-1d63)  
9 [clinician/recommendations/#1476654326462-140275b8-1d63](http://www.choosingwisely.co.uk/i-am-a-clinician/recommendations/#1476654326462-140275b8-1d63)  
10
- 11 39. Boutis K, Howard A, Constantine E, Cuomo A, Narayanan U. Evidence into practice:  
12 Emergency physician management of common pediatric fractures. *Pediatr Emerg Care*. 2014  
13 Jul;30(7):462-8.  
14
- 15 40. Koelink E, Boutis K. Paediatrician office follow-up of common minor fractures. *Paediatr*  
16 *Child Health*. 2014 Oct;19(8):407-12.  
17  
18
- 19 41. Boutis K, Howard A, Constantine E, Cuomo A, Somji Z, Narayanan UG. Evidence into  
20 practice: Pediatric orthopaedic surgeon use of removable splints for common pediatric fractures.  
21 *J Pediatr Orthop*. 2015 Jan;35(1):18-23.  
22  
23
- 24 42. Li, P. A population-based study on the association of standardized protocols in the  
25 emergency department for childhood asthma with outcomes in Ontario, CA [master's thesis].  
26 [Toronto(ON)]: University of Toronto; 2010. 77p.  
27  
28
- 29 43. Kinlin LM, Bahm A, Guttman A, Freedman SB. A survey of emergency department  
30 resources and strategies employed in the treatment of pediatric gastroenteritis. *Acad Emerg Med*.  
31 2013 Apr;20(4):361-6.  
32
- 33 44. Plint A, Clifford T, Perry J, Bulloch B, Pusic M, Lalani A, Ali S, Nguyen BH, Joubert G,  
34 Millar K. Wrist buckle fractures: a survey of current practice patterns and attitudes toward  
35 immobilization. *CJEM*. 2003 Mar;5(2):95-100.  
36  
37
- 38 45. Swennen MH, van der Heijden GJ, Boeije HR, van Rheeën N, Verheul FJ, van der Graaf Y,  
39 Kalkman CJ. Doctors' perceptions and use of best-evidence medicine: a systematic review and  
40 thematic synthesis of qualitative studies. *Acad Med*. 2013 Sep;88(9):1384-96.  
41  
42
- 43 46. Swennen MH, van der Heijden GJ, Blijham GH, Kalkman CJ. Career stage and work setting  
44 create different barriers for best-evidence medicine. *J Eval Clin Pract*. 2011 Aug;17(4):775-85.  
45
- 46 47. Cummings GG, Estabrooks CA, Midodzi WK, Wallin L, Hayduk L. Influence of  
47 organizational characteristics and context on research utilization. *Nurs Res*. 2007 Jul-Aug;56(4  
48 Suppl):S24-39.  
49
- 50 48. Stetler CB, Ritchie JA, Rycroft-Malone J, Schultz AA, Charns MP. Institutionalizing best-  
51 evidence practice: an organizational case study using a model of strategic change. *Implement*  
52 *Sci*. 2009 Nov 30;4:78.  
53  
54  
55  
56  
57  
58  
59  
60

- 1  
2  
3 49. Marchionni C, Ritchie J. Organizational factors that support the implementation of a nursing  
4 best practice guideline. *J Nurs Manag.* 2008 Apr;16(3):266-74.  
5  
6  
7 50. Hisham R, Liew SM, Ng CJ, Mohd Nor K, Osman IF, Ho GJ, Hamzah N, Glasziou P. Rural  
8 Doctors' Views on and Experiences with Best-evidence Medicine: The FrEEDoM Qualitative  
9 Study. *PLoS One.* 2016 Mar 31;11(3):e0152649.  
10  
11 51. Hisham R, Ng CJ, Liew SM, Hamzah N, Ho GJ. Why is there variation in the practice of  
12 best-evidence medicine in primary care? A qualitative study. *BMJ Open.* 2016 Mar  
13 9;6(3):e010565.  
14  
15  
16 52. Wallin L, Ewald U, Wikblad K, Scott-Findlay S, Arnetz BB. Understanding work contextual  
17 factors: a short-cut to best-evidence practice? *Worldviews Evid Based Nurs.* 2006;3(4):153-64.  
18  
19 53. Bernthal NM, Mitchell S, Bales JG, Benhaim P, Silva M. Variation in practice habits in the  
20 treatment of pediatric distal radius fractures. *J Pediatr Orthop B.* 2015 Sep;24(5):400-7.  
21  
22  
23 54. Hospital report 2007 : emergency department care. Ottawa, Ont: Canadian Institute for  
24 Health Information. 2007.  
25  
26 55. Ontario Ministry of Health and Long-Term Care. Schedule of benefits for physician services  
27 under the Health Insurance Act (October 30, 2015 (effective December 21, 2015)). Toronto: The  
28 Ministry; 2015. Retrieved from:  
29 [http://www.health.gov.on.ca/english/providers/program/ohip/sob/physserv/physserv\\_mn.html](http://www.health.gov.on.ca/english/providers/program/ohip/sob/physserv/physserv_mn.html)  
30  
31  
32 56. Ryan LM, Teach SJ, Searcy K, Singer SA, Wood R, Wright JL, Chamberlain JM.  
33 Epidemiology of pediatric forearm fractures in Washington, DC. *J Trauma.* 2010 Oct;69(4  
34 Suppl):S200-5.  
35  
36  
37 57. Crawford SN, Lee LS, Izuka BH. Closed treatment of overriding distal radial fractures  
38 without reduction in children. *J Bone Joint Surg Am.* 2012 Feb 1;94(3):246-52.  
39  
40 58. Godfrey J, Little KJ, Roger C, Carr P, Samora J. Increasing Brace Treatment for Distal  
41 Radius Buckle Fractures: Using Quality Improvement Methodology to Implement Evidence-  
42 Based Medicine. *J Hand Surg.* 2017 Sept;49(9):S25.  
43  
44  
45  
46  
47  
48  
49  
50  
51  
52  
53  
54  
55  
56  
57  
58  
59  
60

**Table 1: Description of LRPDRF cohort, stratified by outcome of interest, best-evidence treatment. Mean (SD) for continuous, N(%) for categorical variables**

| Predictor of interest              | Best-evidence treatment | Other treatment | Total          |
|------------------------------------|-------------------------|-----------------|----------------|
| Sample size, N(%)                  | 14,742 (20.82)          | 56,059 (79.18)  | 70,801 (100.0) |
| Patient sex, N(%)                  |                         |                 |                |
| Male                               | 8775 (59.52)            | 34,713 (61.92)  | 43,488 (61.42) |
| Female                             | 5967 (40.48)            | 21,346 (38.08)  | 27,313 (38.58) |
| Patient age at diagnosis, Mean(SD) | 9.22 (3.21)             | 9.25 (3.20)     | 9.24 (3.20)    |
| Patient deprivation quintile, N(%) |                         |                 |                |
| (Least Marginalized) 1             | 3733 (25.32)            | 15,408 (27.49)  | 19,141 (27.03) |
| 2                                  | 3162 (21.45)            | 12,228 (21.81)  | 15,390 (21.74) |
| 3                                  | 2856 (19.37)            | 10,258 (18.30)  | 13,114 (18.52) |
| 4                                  | 2578 (17.49)            | 8974 (16.01)    | 11,552 (16.32) |
| (Most marginalized) 5              | 2413 (16.37)            | 9191 (16.40)    | 11,604 (16.39) |
| Rural patient residence, N(%)      |                         |                 |                |
| Yes                                | 2689 (18.24)            | 5135 (9.16)     | 7824 (11.05)   |
| No                                 | 12,053 (81.76)          | 50,924 (90.84)  | 62,977 (88.95) |
| Rural ER, N(%)                     |                         |                 |                |
| Yes                                | 2135 (14.48)            | 3458 (6.17)     | 5593 (7.90)    |
| No                                 | 12,607 (85.52)          | 52,601 (93.83)  | 65,208 (92.10) |
| Hospital Type, N(%)                |                         |                 |                |
| Paediatric                         | 1362 (9.24)             | 4298 (7.67)     | 5,660 (7.99)   |
| Teaching                           | 1274 (8.64)             | 5880 (10.49)    | 7154 (10.10)   |
| Community                          | 10,394 (70.51)          | 43,495 (77.59)  | 53,889 (76.11) |
| Small                              | 1712 (11.61)            | 2386 (4.26)     | 4,098 (5.79)   |
| Year of MD graduation, N(%)        |                         |                 |                |
| Before 2002                        | 12,012 (81.48)          | 44,637 (79.63)  | 56,649 (80.01) |
| After 2002                         | 2730 (18.52)            | 11,422 (20.37)  | 14,152 (19.99) |
| Physician specialty in ED, N(%)    |                         |                 |                |
| ER                                 | 1103 (7.48)             | 5022 (8.96)     | 6125 (8.65)    |
| FP/ER                              | 5894 (39.98)            | 25,276 (45.09)  | 31,170 (44.02) |
| FP/GP                              | 6130 (41.58)            | 20,450 (36.48)  | 26,580 (37.54) |
| Peds                               | 984 (6.67)              | 3559 (6.35)     | 4,543 (6.42)   |
| PEM                                | 522 (3.54)              | 1090 (1.94)     | 1612 (2.28)    |
| Ortho                              | 109 (0.74)              | 662 (1.18)      | 771 (1.09)     |

1  
2  
3  
4  
5  
6  
7  
8  
9  
10  
11  
12  
13  
14  
15  
16  
17  
18  
19  
20  
21  
22  
23  
24  
25  
26  
27  
28  
29  
30  
31  
32  
33  
34  
35  
36  
37  
38  
39  
40  
41  
42  
43  
44  
45  
46  
47  
48  
49  
50  
51  
52  
53  
54  
55  
56  
57  
58  
59  
60

| Fiscal Year | 2003        | 2004        | 2005        | 2006        | 2007        | 2008        | 2009        | 2010        | 2011        | 2012        | 2013        | 2014        | 2015        |
|-------------|-------------|-------------|-------------|-------------|-------------|-------------|-------------|-------------|-------------|-------------|-------------|-------------|-------------|
|             | 429 (2.91)  | 1187 (8.05) | 1174 (7.96) | 1222 (8.29) | 1167 (7.92) | 1136 (7.71) | 1160 (7.87) | 1208 (8.19) | 1263 (8.57) | 1238 (8.40) | 1262 (8.56) | 1261 (8.55) | 1035 (7.02) |
|             | 1939 (3.46) | 5089 (9.08) | 4854 (8.66) | 4552 (8.12) | 4561 (8.14) | 4439 (7.92) | 4464 (7.96) | 4352 (7.76) | 4414 (7.87) | 4152 (7.41) | 4412 (7.87) | 4522 (8.07) | 4309 (7.69) |
|             | 2368 (3.34) | 6276 (8.86) | 6028 (8.51) | 5774 (8.16) | 5728 (8.09) | 5575 (7.87) | 5624 (7.94) | 5560 (7.85) | 5677 (8.02) | 5390 (7.61) | 5674 (8.01) | 5783 (8.17) | 5344 (7.55) |

**Figure 1: Yearly variation in type of follow-up visit for LRPDRF**

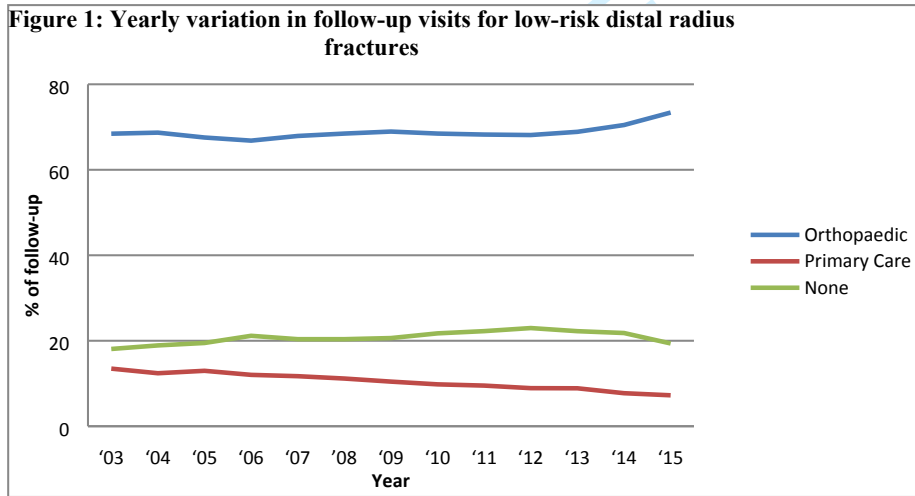



**Table 2: Multivariable log binomial regression analysis of factors predictive of receiving best-evidence treatment for a LRPDRF (n = 70,801)**

| Predictor of interest                                        | Adjusted RR for best-evidence treatment (95% CI) | p-value   |
|--------------------------------------------------------------|--------------------------------------------------|-----------|
| Sex                                                          |                                                  |           |
| Male                                                         | 1.00 (ref)                                       | <0.0001 * |
| Female                                                       | 1.08 (1.05-1.11)                                 |           |
| Age                                                          | 1.00 (0.99-1.01)                                 | 0.1572    |
| Patient deprivation quintile, N(%)<br>(Least Marginalized) 1 | 1.00 (ref)                                       | -         |
| 2                                                            | 1.01 (0.97-1.05)                                 | 0.6043    |
| 3                                                            | 1.04 (0.99-1.09)                                 | 0.0542    |
| 4                                                            | 1.06 (1.01-1.10)                                 | 0.0171 *  |
| (Most marginalized) 5                                        | 1.03 (0.99-1.08)                                 | 0.1847    |
| Rural Residence                                              |                                                  |           |
| Yes                                                          | 1.44 (1.38-1.50)                                 | <0.0001 * |
| No                                                           | 1.00 (ref)                                       | -         |
| Hospital Type                                                |                                                  |           |
| Paediatric                                                   | 1.16 (1.07-1.26)                                 | 0.0002 *  |
| Teaching                                                     | 1.00 (ref)                                       | -         |
| Community                                                    | 1.13 (1.06-1.20)                                 | <0.0001 * |
| Small                                                        | 1.86 (1.72-2.01)                                 | <0.0001 * |
| Physician specialty in ED                                    |                                                  |           |
| ER                                                           | 1.00 (ref)                                       | -         |
| FP/ER                                                        | 1.00 (0.94-1.06)                                 | 0.9474    |
| FP/GP                                                        | 1.09 (1.02-1.16)                                 | 0.0077 *  |
| Pediatrics                                                   | 1.22 (1.11-1.34)                                 | <0.0001 * |
| PEM                                                          | 1.73 (1.56-1.92)                                 | <0.0001 * |
| Orthopaedics                                                 | 0.76 (0.63-0.91)                                 | 0.0027 *  |
| Fiscal Year                                                  |                                                  |           |
| 2003                                                         | 1.00 (ref)                                       | -         |
| 2004                                                         | 1.05 (0.95-1.16)                                 | 0.3119    |
| 2005                                                         | 1.09 (0.99-1.21)                                 | 0.0782    |
| 2006                                                         | 1.18 (1.07-1.31)                                 | 0.0007 *  |
| 2007                                                         | 1.13 (1.03-1.25)                                 | 0.0138 *  |
| 2008                                                         | 1.16 (1.05-1.28)                                 | 0.0034 *  |
| 2009                                                         | 1.14 (1.04 -1.26)                                | 0.0074 *  |
| 2010                                                         | 1.19 (1.08-1.32)                                 | 0.0004 *  |
| 2011                                                         | 1.20 (1.09-1.33)                                 | 0.0002 *  |
| 2012                                                         | 1.24 (1.12-1.37)                                 | <0.0001 * |
| 2013                                                         | 1.21 (1.09-1.33)                                 | 0.0002 *  |
| 2014                                                         | 1.19 (1.08-1.31)                                 | 0.0005 *  |
| 2015                                                         | 1.06 (0.95-1.17)                                 | 0.2896    |

\* p significant at &lt; 0.05

Table 2. Forest plot of multivariable analysis of factors predictive of receiving best evidence treatment

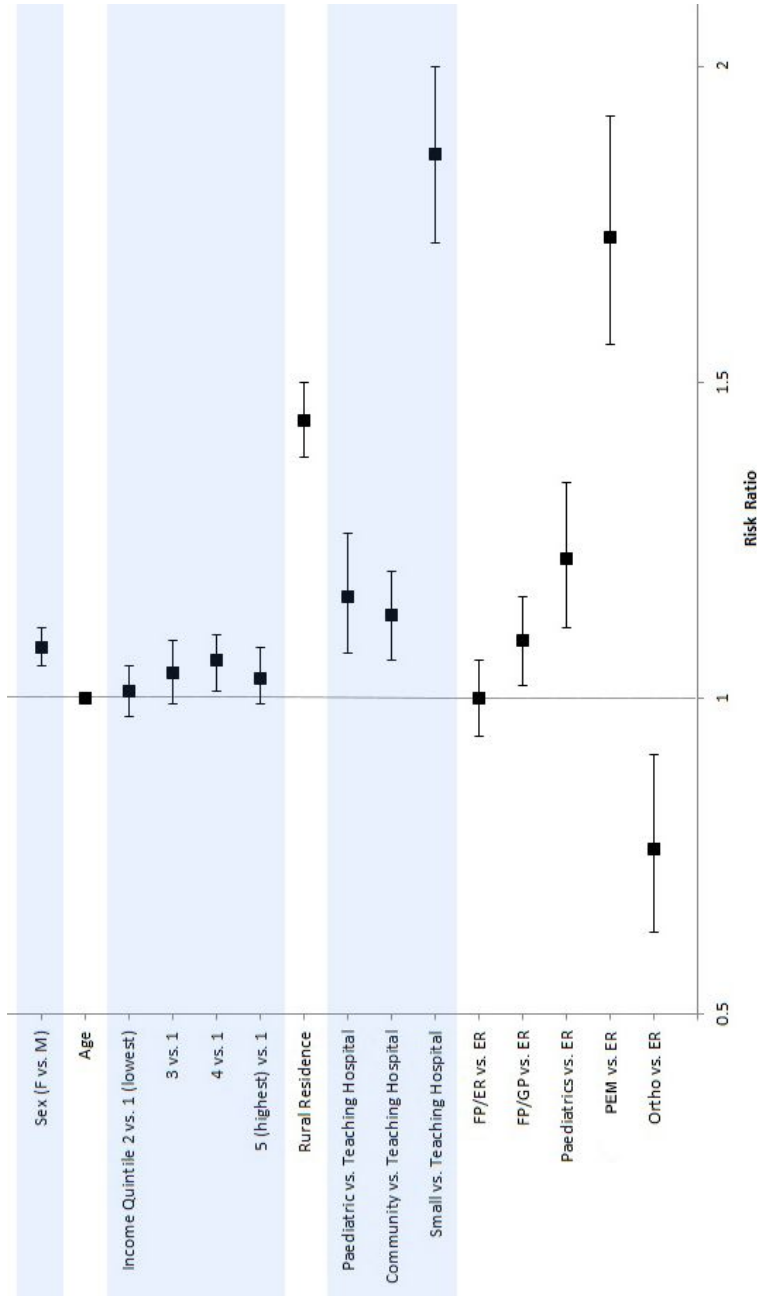

**Commented [1]:**  
This figure is the main result and should be included in the manuscript with a descriptive legend.
